# Supplementary material for: Modulation of lactate-lysosome axis in dendritic cells by clotrimazole potentiates antitumor immunity
Source: PubMed Central journal article supplement — J Immunother Cancer. 2021 May 20;9(5):e002155. doi: 10.1136/jitc-2020-002155 (PMC8141455; doi:10.1136/jitc-2020-002155), 2021-05-20
Supplement: jitc-2020-002155supp001.pdf [file jitc-2020-002155supp001.pdf]

## Supplementary Figures

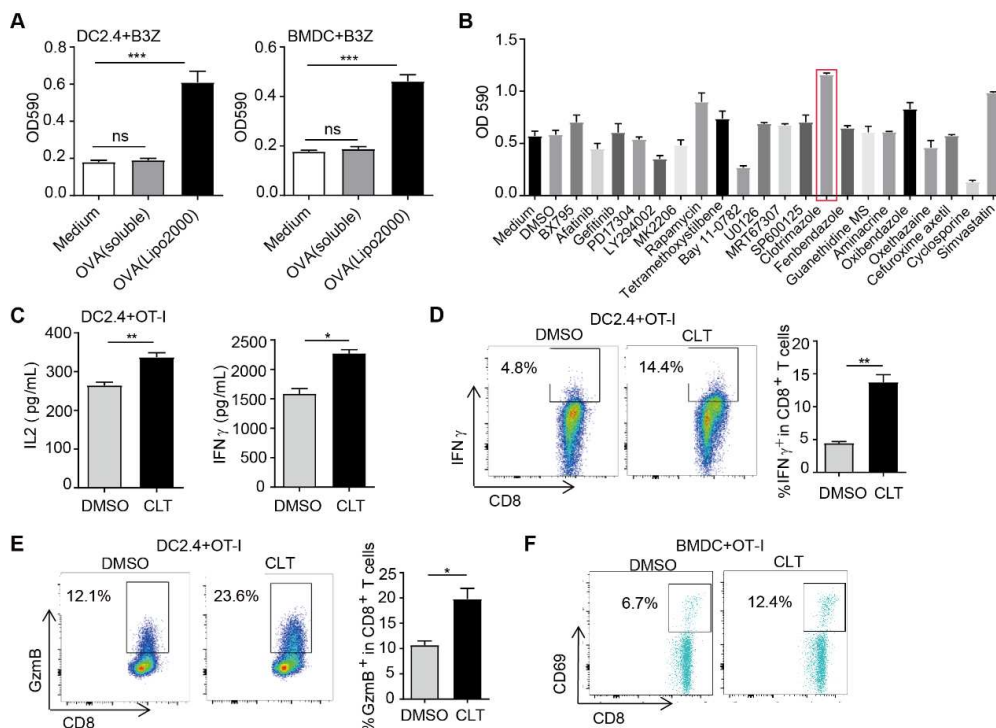**Supplementary Figure 1. Clotrimazole enhanced DC-induced T cell activation.**

**A.** OVA (100  $\mu\text{g}/\text{mL}$ ) was added or transfected by Lipo2000 into DC2.4 or BMDCs for about 20 hrs, followed by co-cultured with B3Z for additional 24 hrs, after which B3Z activation was measured by LacZ activity.

**B.** DC2.4 cells were pretreated with different drugs or inhibitors for 2 hrs, and transfected with OVA (100  $\mu\text{g}/\text{mL}$ ) for 20 hrs, followed by co-culture with B3Z cells for an additional 24 hrs, after which LacZ activity in B3Z cells were measured. Clotrimazole pretreated DCs induced the highest LacZ activity in B3Z cells.

**C-E.** DC2.4 cells were treated with clotrimazole or DMSO, then transfected with OVA (100  $\mu\text{g}/\text{mL}$ ) for 20hrs, and co-cultured with OT-I cells for additional 24 hrs, after which OT-I cells activation were measured by IL-2 production, IFN $\gamma$  production(**C**), and intracellular expression of IFN $\gamma$ (**D**) and GZMB(**E**).

**F.** BMDCs were treated with clotrimazole or DMSO, then transfected with OVA (100  $\mu\text{g}/\text{mL}$ ) for 20 hrs, and co-culture with OT-I cells for additional 24 hrs, after which OT-I cells activation were measured by CD69 expression.

Data in **A-F** are the representative results of 3 repeated experiments. \* $P < 0.05$ , \*\* $P < 0.01$ , \*\*\* $P < 0.001$  and ns=not significant, by one-way ANOVA with Bonferroni's post-test.

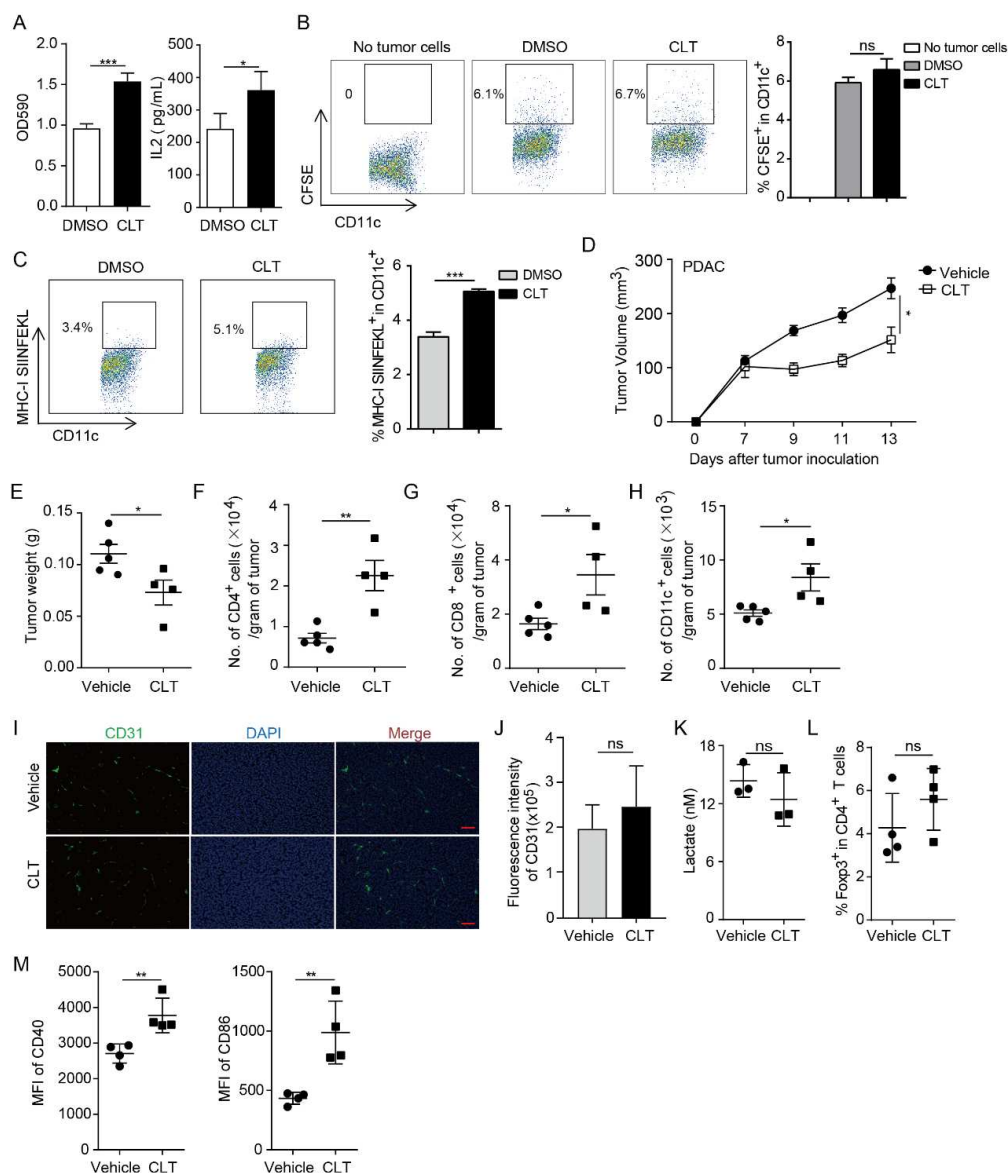

### Supplementary Figure 2. Clotrimazole inhibited tumor growth and induced immune cell infiltration into tumor microenvironment.

**A.** The mixture of BMDCs and live B16-OVA cells were treated with clotrimazole (10  $\mu$ M) or DMSO for 20 hrs, then co-cultured with B3Z cells for additional 24 hrs. The LacZ activity and IL-2 production were measured.

**B.** BMDCs were pretreated with Clotrimazole or DMSO, then co-cultured with CFSE-labeled B16-OVA cells for 2hrs; after extensive wash, the CFSE signal in CD11c<sup>+</sup> cells were detected by flow cytometry.

**C.** BMDCs were pretreated with Clotrimazole or DMSO, then co-cultured with B16-OVA cells for 24 hrs, after which the MHC-I-SIINFEKL expression on DCs were detected by flow cytometry.

**D.** B6 mice with established PDAC tumors were treated with clotrimazole or vehicle

on day 5-9 (40 mg/kg, i.p.), and tumor growth was monitored. Tumor volume is shown as mean  $\pm$  SD.  $n = 5$  for vehicle group and  $n=4$  for clotrimazole group.

**E-H.** B6 mice with established PDAC tumors were with clotrimazole or vehicle on day 5-9 (40 mg/kg, i.p.). Tumors were isolated on day 13, and tumor-infiltrating immune cells were analyzed by flow cytometry. Shown are tumor weight (**E**), numbers of tumor-infiltrating CD4<sup>+</sup> T cells (**F**), CD8<sup>+</sup> T cells (**G**), and CD11c<sup>+</sup> dendritic cells (**H**),  $n=5$  for vehicle and  $n=4$  for clotrimazole group.

**I-M.** C57/B6 mice with established MC38 tumors were treated with vehicle or clotrimazole (40mg/kg, day 3-7, i.p.). Tumors were harvested at day 11. The expression pattern of CD31 in tumors was detected by immunofluorescence (**I, J**), lactate concentration was measured (shown as per gram tumor) (**K**), the infiltrated FoxP3<sup>+</sup> cells and co-stimulatory molecule expression on CD11c<sup>+</sup> cells were detected by flow cytometry (**L-M**).  $n=3$  for (**I, J**),  $n=4$  for (**L, M**). Scale bar=50  $\mu$ m in **I**.

Tumor volume is presented as mean  $\pm$ SD, \* $P < 0.05$ , \*\* $P < 0.01$ , by unpaired Student's  $t$  test (**A-H, J-M**) or two-way ANOVA with Bonferroni's post-test (**D**).

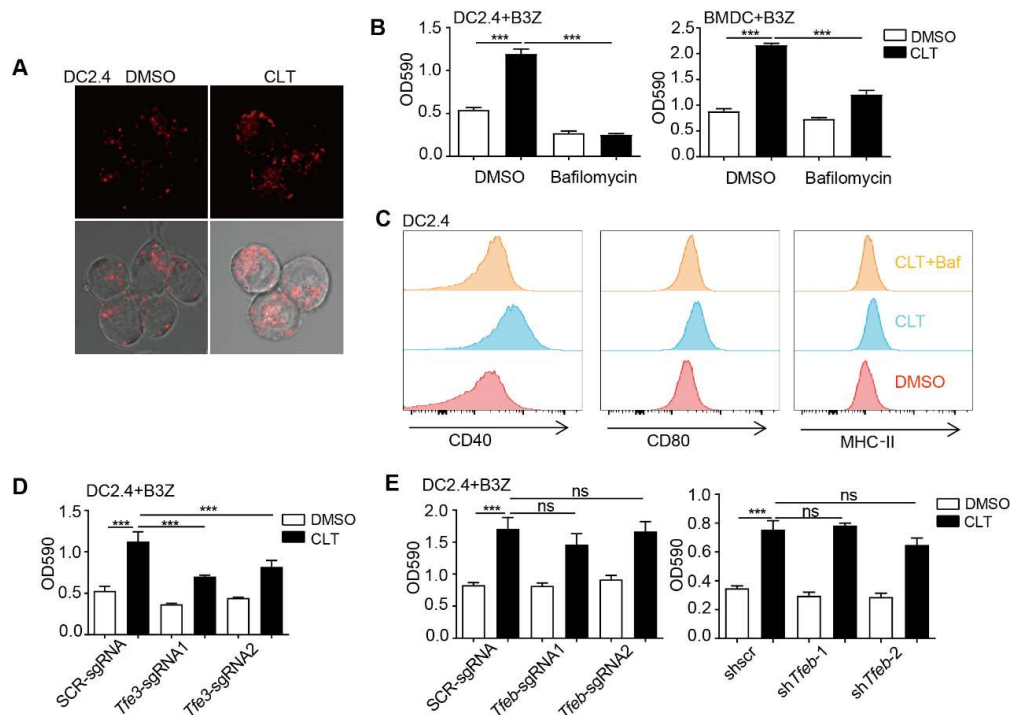

**Supplementary Figure 3. Clotrimazole induced DC activation by lysosome-associated pathway.**

**A.** DC2.4 cells were treated with clotrimazole or DMSO for 24 hrs, the PE-labeled lysosome tracker was added into the medium for another 30 mins. The fluorescence signal was detected by fluorescent microscopy.

**B.** BMDC or DC2.4 cells were treated with DMSO, clotrimazole, bafilomycin or clotrimazole+bafilomycin, then transfected with OVA (100  $\mu\text{g}/\text{mL}$ ) for 20 hrs, and co-culture with B3Z for additional 24 hrs, after which B3Z cells activation were measured by LacZ activity.

**C.** DC2.4 cells were treated with DMSO, clotrimazole, clotrimazole+bafilomycin for 24 hrs, the expression of CD40, CD80 and MHC-II were measured by flow cytometry.

**D.** DC2.4 cells were treated clotrimazole or DMSO, then transfected with OVA (100  $\mu\text{g}/\text{mL}$ ) for 20 hrs, and co-cultured with B3Z for additional 24 hrs, after which B3Z cells activation were measured by LacZ activity.

**E.** DC2.4 cells were treated with clotrimazole or DMSO for 20 hrs, then transfected with OVA (100  $\mu\text{g}/\text{mL}$ ) for 20 hrs, and co-cultured with B3Z for additional 24 hrs, after which B3Z cells activation were measured by LacZ activity.

Data in **A-E** are the representative result of 3 repeated experiments. \* $P < 0.05$ , \*\* $P < 0.01$ , \*\*\* $P < 0.001$  and ns=not significant, by one-way ANOVA with Bonferroni's post-test.

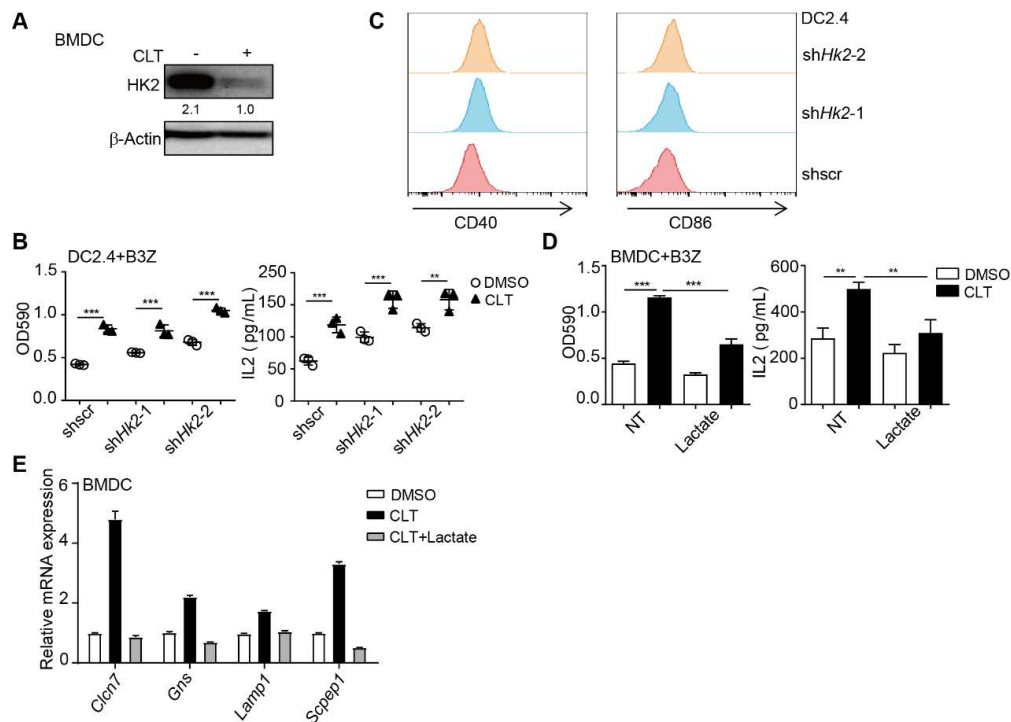

#### Supplementary Figure 4. Clotrimazole inhibited lactate production by targeting HK2 in DCs.

**A.** BMDCs were treated with clotrimazole or DMSO for 24 hrs, then HK2 expression was detected by WB.

**B.** The expression of CD40 and CD86 in DC2.4 cells were detected by flow cytometry.

**C.** DC2.4 cells were treated with clotrimazole or DMSO, then transfected with OVA (100  $\mu$ g/mL) for 20 hrs, then co-cultured with B3Z for additional 24hrs, after which B3Z cells activation was measured by LacZ activity and IL-2 production.

**D.** BMDCs were treated with DMSO, clotrimazole, lactate or clotrimazole+lactate, then transfected with OVA (100  $\mu$ g/mL) for 20 hrs, then co-cultured with B3Z for additional 24 hrs, after which B3Z cells activation was measured by LacZ activity and IL-2 production.

**E.** BMDCs were treated with DMSO, clotrimazole, lactate or clotrimazole+lactate for 24hrs. The expression of lysosome-associated genes was measure by qPCR.

Data in **A-D** are the representative result of 3 repeated experiments. Data in **E** are shown as mean  $\pm$  SD of 3 replicates from 1 representative experiment. \*\* $P < 0.01$ , \*\*\* $P < 0.001$ , by one-way ANOVA with Bonferroni's post-test.

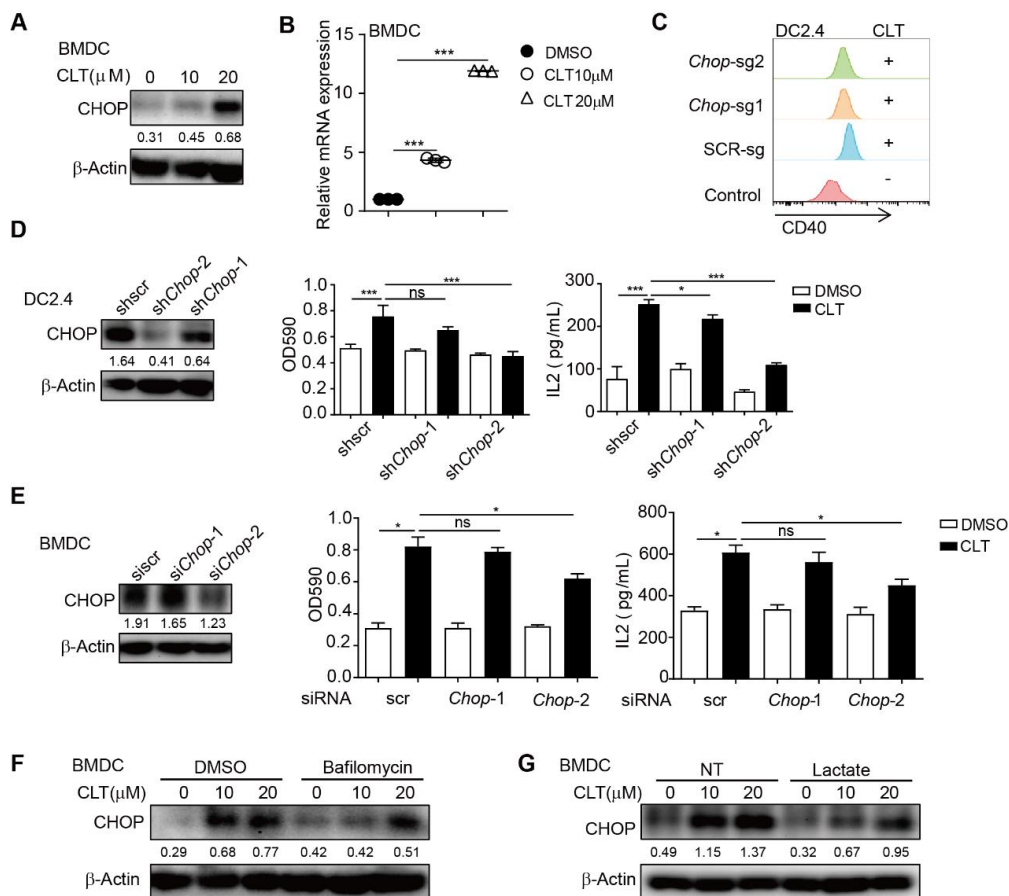

### Supplementary Figure 5. Clotrimazole induced DC activation depending on CHOP.

**A-B.** BMDCs were treated with clotrimazole or DMSO for 24 hrs, and the expression of CHOP was detected by WB (**A**) or qPCR (**B**).

**C.** DC2.4 cells were treated with clotrimazole or DMSO for 24hrs, after which the expression of CD40 were detected by flow cytometry.

**D.** DC2.4 cells were treated with clotrimazole or DMSO, then transfected with OVA (100  $\mu$ g/mL) for 20 hrs, followed by co-culture with B3Z for additional 24 hrs, after which B3Z cells activation was measured by LacZ activity and IL-2 production. WB detected the knockdown efficiency of CHOP by shRNA.

**E.** BMDCs were transfected with CHOP-siRNA or NC-siRNA, then treated with clotrimazole or DMSO, and transfected with OVA (100  $\mu$ g/mL) for 20 hrs, followed by co-cultured with B3Z for additional 24 hrs, after which B3Z cell activation were measured by LacZ activity and IL-2 production. WB detected the knockdown efficiency of CHOP by siRNA.

**F.** BMDCs were treated with DMSO, clotrimazole, bafilomycin or clotrimazole+bafilomycin for 24 hrs, the expression CHOP was detected by WB.

**G.** BMDCs were treated with DMSO, clotrimazole, lactate or clotrimazole+lactate for 24 hrs, the expression CHOP was detected by WB.

Data in **A, C, D, E, F, G** are the representative result of 3 repeated experiments. Data in **B** are shown as mean  $\pm$  SD of 3 replicates from 1 representative experiment. \* $P < 0.05$ , \*\*\* $P < 0.001$  and ns=no significant, by one-way ANOVA with Bonferroni's post-test.

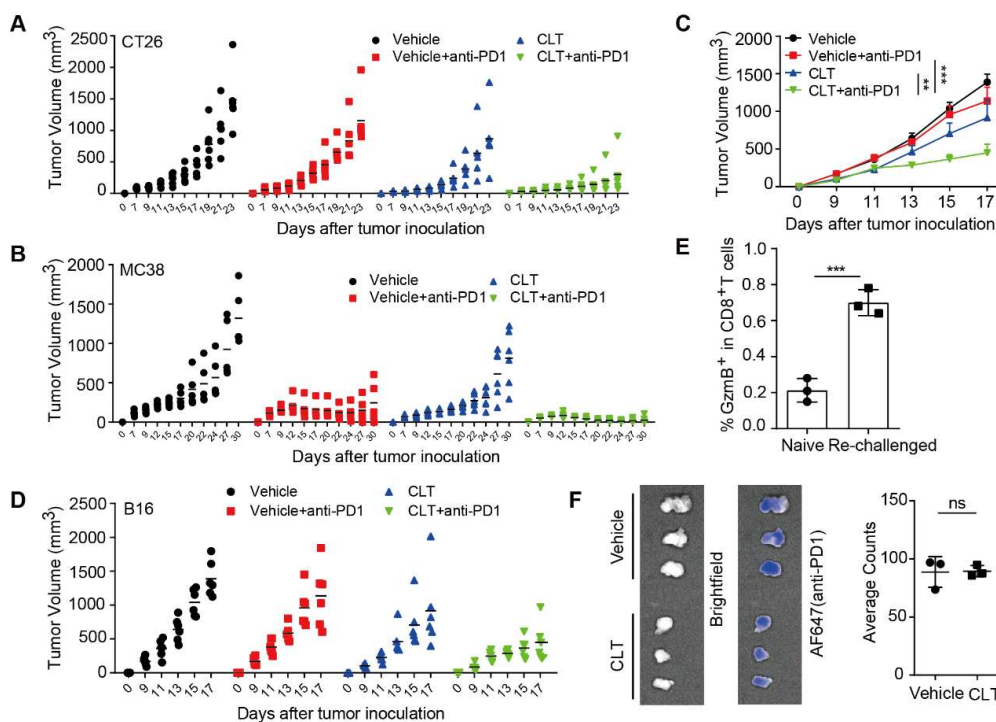

### Supplementary Figure 6. Clotrimazole potentiated the efficacy of anti-PD1 therapy in multiple mouse tumor models.

**A.** Individual tumor growth curve of each mouse in CT26 tumor model which were treated with clotrimazole, anti-PD1, or clotrimazole in combination with anti-PD1.

**B.** Individual tumor growth curve of each mouse in MC38 tumor model which were treated with clotrimazole, anti-PD1, or clotrimazole in combination with anti-PD1.

**C.** B6 mice were subcutaneously injected with B16 tumor cells and divided into 4 groups stochastically, then treated with clotrimazole (40 mg/kg, day3-7), anti-PD1 (7.5mg/kg, day 9/12), or clotrimazole in combination with anti-PD1 at indicated time points. Tumor volume was shown as mean  $\pm$  SD. n=6 for each group.

**D.** Individual tumor growth curve of each mouse in B16 tumor model which were treated as described in C.

**E.** CD8<sup>+</sup> T cells from the mice lymph node which previously rejected MC38 tumors upon combination therapy co-culture with MC38 tumor cells for 24 hrs, the intracellular GZMB production were detected by flow cytometry.

**F.** Left panel: B6 mice were subcutaneously injected with MC38 tumor cells and then treated with clotrimazole (40 mg/kg) or vehicle on day 3-7; AF647 labeled anti-PD1 (5 mg/kg) were injected on day 9. Tumors were harvested 24 hrs later, and the tumor distribution of anti-PD1 antibody was measured by IVIS Lumina III imaging system (Perkin-Elmer). Right panel: the average fluorescence of each tumor was quantitated. n=3 for each group.

Tumor volume is presented as mean  $\pm$ SD, \*\*P < 0.01, \*\*\*P < 0.001 and ns=not significant, by two-way ANOVA with Bonferroni's post-test (C) or unpaired Student's t test (E-F).



Supplementary Table 1.

| The sequences of primers used for qPCR |                                |
|----------------------------------------|--------------------------------|
| <i>Actin</i> -FP                       | 5'-AGAGGGAAATCGTGCGTGAC-3'     |
| <i>Actin</i> -RP                       | 5'-CAATAGTGATGACCTGGCCGT-3'    |
| <i>Cln7</i> -FP                        | 5'-CGCCAGTCTCATTCTGCACT-3'     |
| <i>Cln7</i> -RP                        | 5'-GCTTCTCGTTGTGTGGAATCT-3'    |
| <i>Gns</i> -FP                         | 5'-CGGTGTGCGGCTATCAGAC-3'      |
| <i>Gns</i> -RP                         | 5'-CAGGGCATAACCAGTAACTCCA-3'   |
| <i>Lamp1</i> -FP                       | 5'-CAGCACTCTTTGAGGTGAAAAAC-3'  |
| <i>Lamp1</i> -RP                       | 5'-ACGATCTGAGAACCATTTCGCA-3'   |
| <i>Naglu</i> -FP                       | 5'-ACCGCTATTACCAGAATGTGTG-3'   |
| <i>Naglu</i> -RP                       | 5'-GTGTGCAAGTTACCCATGCG-3'     |
| <i>Scpep1</i> -FP                      | 5'-CTGCTGCTCCTATCGTTCTTAC-3'   |
| <i>Scpep1</i> -RP                      | 5'-CCTTTCGGACAGTCACATAATCC-3'  |
| <i>Tap1</i> -FP                        | 5'-GGACTTGCCTTGTTCCGAGAG-3'    |
| <i>Tap1</i> -RP                        | 5'-GCTGCCACATAACTGATAGCGA-3'   |
| <i>Tap2</i> -FP                        | 5'-CTGGCGGACATGGCTTTACTT-3'    |
| <i>Tap2</i> -RP                        | 5'-CTCCCACTTTTAGCAGTCCCC-3'    |
| <i>Earp1</i> -FP                       | 5'-TAATGGAGACTCATTCCCTTGGGA-3' |
| <i>Earp1</i> -RP                       | 5'-AAAGTCAGAGTGCTGAGGTTTG-3'   |
| <i>B2m</i> -FP                         | 5'-TTCTGGTGCTTGTCTCACTGA-3'    |
| <i>B2m</i> -RP                         | 5'-CAGTATGTTTCGGCTTCCCATTC-3'  |
| <i>Chop</i> -FP                        | 5'-GTCCCTAGCTTGGCTGACAGA-3'    |
| <i>Chop</i> -RP                        | 5'-TGGAGAGCGAGGGCTTTG-3'       |
| <i>CD86</i> -FP                        | 5'-ACGTATTGGAAGGAGATTACAGCT-3' |
| <i>CD86</i> -RP                        | 5'-TCTGTCAGCGTTACTATCCCGC-3'   |

Supplementary Table 2.

## The list of drugs/inhibitors used for screening

| Drugs/inhibitors | Target/Bioactivity   | Drugs/inhibitors         | Target/Bioactivity   |
|------------------|----------------------|--------------------------|----------------------|
| BX795            | PDK1                 | Tetramethoxystilbene     | antineoplastic       |
| Afatinib         | EGFR/ErbB            | Clotrimazole             | antifungal           |
| Gefitinib        | EGFR                 | Fenbendazole             | anthelmintic         |
| PD17304          | FGFR1                | Guanethidine monosulfate | antihypertensive     |
| LY294002         | PI3K                 | Aminacrine               | local antiseptic     |
| MK2206           | AKT                  | Oxibendazole             | anthelmintic         |
| Rapamycin        | mTOR                 | Oxethazaine              | anesthetic           |
| SP600125         | JNK                  | Cefuroxime axetil        | antibacterial        |
| Bay 11-0782      | IKK $\beta$          | Cyclosporine             | immunosuppressant    |
| U0126            | MEK                  | Simvastatin              | Cholesterol-lowering |
| MRT67307         | IKK $\epsilon$ /TBK1 |                          |                      |
